# Supplementary material
Source: Research Square preprint supplement (doi:10.21203/rs.3.rs-9936521/v1)
Supplement: Supplementary file 2 [file 7bb6bdee7a572d260883c08d.docx]

**Supplementary File 3**

**Table S1** Spearman correlation matrix of key outcomes and their changes

| **Variable** | **ΔIL-18** | **ΔCRP** | **Resting VAS (24 h)** | **Movement VAS (24 h)** | **ΔPSQI (D1)** | **ΔPSQI (D3)** | **ΔISI (D1)** | **ΔISI (D3)** | **EPDS (72 h)** |
| --- | --- | --- | --- | --- | --- | --- | --- | --- | --- |
| ΔIL-18 | — |  |  |  |  |  |  |  |  |
| ΔCRP | 0.218* | — |  |  |  |  |  |  |  |
| Resting VAS (24 h) | 0.008 | 0.194* | — |  |  |  |  |  |  |
| Movement VAS (24 h) | 0.107 | 0.347*** | 0.123 | — |  |  |  |  |  |
| ΔPSQI (D1) | 0.096 | 0.309*** | 0.070 | 0.129 | — |  |  |  |  |
| ΔPSQI (D3) | 0.051 | 0.155 | 0.166 | −0.039 | 0.213* | — |  |  |  |
| ΔISI (D1) | 0.098 | 0.239** | 0.074 | 0.119 | 0.230* | 0.210* | — |  |  |
| ΔISI (D3) | −0.009 | 0.046 | −0.046 | 0.135 | 0.180* | 0.078 | 0.317*** | — |  |
| EPDS (72 h) | 0.211* | 0.353*** | 0.189* | 0.181* | 0.293** | 0.357*** | 0.275** | 0.017 | — |

Values are Spearman rank correlation coefficients (n = 121). Only the lower triangle is displayed. Δ denotes the change from preoperative baseline (postoperative−preoperative). D1, postoperative day 1; D3, postoperative day 3. *P < 0.05; **P < 0.01; ***P < 0.001. This was an exploratory analysis without correction for multiple comparisons; results should be interpreted in the light of effect sizes.

**Table S2** The GEE analysis of repeated-measures outcomes

| **Outcome** | **Effect** | **Wald χ²** | **df** | **P value** |
| --- | --- | --- | --- | --- |
| PSQI | Group | 32.790 | 1 | < 0.001 |
|  | Time | 1039.868 | 2 | < 0.001 |
|  | Group × Time | 37.513 | 2 | < 0.001 |
| ISI | Group | 29.259 | 1 | < 0.001 |
|  | Time | 181.074 | 2 | < 0.001 |
|  | Group × Time | 19.870 | 2 | < 0.001 |
| EPDS | Group | 60.236 | 1 | < 0.001 |
|  | Time | 547.568 | 2 | < 0.001 |
|  | Group × Time | 41.140 | 2 | < 0.001 |
| Resting VAS | Group | 12.016 | 1 | < 0.001 |
|  | Time | 595.276 | 3 | < 0.001 |
|  | Group × Time | 12.104 | 3 | 0.007 |
| Movement VAS | Group | 32.839 | 1 | < 0.001 |
|  | Time | 1234.532 | 3 | < 0.001 |
|  | Group × Time | 17.078 | 3 | < 0.001 |

All models used an identity link, exchangeable working correlation structure and robust standard errors. Type III sums of squares were used for effect testing.
