# Supplementary material
Source: Research Square preprint supplement (doi:10.21203/rs.3.rs-9936521/v1)
Supplement: Supplementary file 3 [file bd05aab60a5ea17b3aed6708.docx]

**Supplementary File 2**

| **Instrument** | **Full name** | **Outcome domain** | **Assessment time points in the manuscript** | **Score range** | **Direction of score** |
| --- | --- | --- | --- | --- | --- |
| PSQI | Pittsburgh Sleep Quality Index | Sleep quality | Preoperative baseline; postoperative day 1; postoperative day 3 | 0-21 | Higher score = poorer sleep quality |
| ISI | Insomnia Severity Index | Insomnia severity | Preoperative baseline; postoperative day 1; postoperative day 3 | 0-28 | Higher score = more severe insomnia |
| EPDS | Edinburgh Postnatal Depression Scale | Postnatal depressive symptoms | Preoperative baseline; 24 h postoperatively; 72 h postoperatively | 0-30 | Higher score = more severe depressive symptoms |
| VAS / modified NRS | Visual Analogue Scale / modified 0-10 numeric pain rating | Postoperative pain at rest and during movement | 2, 6, 24 and 48 h postoperatively | 0-10 | Higher score = more severe pain |

# **Pittsburgh Sleep Quality Index (PSQI) - English CRF Template**

Purpose: Assessment of subjective sleep quality and sleep disturbance. In the manuscript, PSQI was assessed preoperatively, on postoperative day 1, and on postoperative day 3.

| **Component No.** | **PSQI component** | **Score (0-3)** | **Data entry check** |
| --- | --- | --- | --- |
| 1 | Subjective sleep quality |  | 0=best; 3=worst |
| 2 | Sleep latency |  | 0-3 |
| 3 | Sleep duration |  | 0-3 |
| 4 | Habitual sleep efficiency |  | 0-3 |
| 5 | Sleep disturbances |  | 0-3 |
| 6 | Use of sleeping medication |  | 0-3 |
| 7 | Daytime dysfunction |  | 0-3 |
| Total | Sum of seven component scores |  | 0-21 |
| **Suggested interpretation** | | **PSQI total score** | |
| Better sleep quality | | Lower score | |
| Poorer sleep quality | | Higher score | |
| Common screening threshold for poor sleep quality | | >5 in many adult populations; justify threshold if used in this trial | |

# Insomnia Severity Index (ISI) - English CRF Template

Purpose: Assessment of perceived insomnia severity. In the manuscript, ISI was assessed preoperatively, on postoperative day 1, and on postoperative day 3.

| **Item/domain No.** | **ISI domain** | **Score (0-4)** | **Data entry check** |
| --- | --- | --- | --- |
| 1 | Difficulty falling asleep |  | 0-4 |
| 2 | Difficulty staying asleep |  | 0-4 |
| 3 | Early-morning awakening |  | 0-4 |
| 4 | Satisfaction/dissatisfaction with current sleep pattern |  | 0-4 |
| 5 | Interference with daytime functioning |  | 0-4 |
| 6 | Noticeability of impairment attributed to sleep problem |  | 0-4 |
| 7 | Distress or concern caused by sleep problem |  | 0-4 |
| Total | Sum of seven item scores |  | 0-28 |
| **ISI total score** | | **Common severity category** | |
| 0-7 | | No clinically significant insomnia | |
| 8-14 | | Subthreshold insomnia | |
| 15-21 | | Moderate insomnia | |
| 22-28 | | Severe insomnia | |

# Edinburgh Postnatal Depression Scale (EPDS) - English CRF Template

Purpose: Screening of postnatal depressive symptoms. In the manuscript, EPDS was assessed preoperatively, at 24 h postoperatively, and at 72 h postoperatively.

| **Item No.** | **EPDS symptom domain for CRF coding** | **Score (0-3)** | **Reverse scoring / check** |
| --- | --- | --- | --- |
| 1 | Ability to laugh / see the funny side |  | Check official scoring key |
| 2 | Looking forward with enjoyment |  | Check official scoring key |
| 3 | Self-blame when things go wrong |  | Check official scoring key |
| 4 | Anxiety or worry |  | Check official scoring key |
| 5 | Panic or fear |  | Check official scoring key |
| 6 | Feeling overwhelmed |  | Check official scoring key |
| 7 | Sleep difficulty related to mood |  | Check official scoring key |
| 8 | Sadness or misery |  | Check official scoring key |
| 9 | Crying |  | Check official scoring key |
| 10 | Thoughts of self-harm |  | Requires immediate clinical safety review if endorsed |
| Total | Sum of ten item scores |  | 0-30 |
| **Reporting guidance** | | **Recommended wording** | |
| Outcome label | | EPDS score, not diagnosis of postpartum depression | |
| Thresholds | | State the predefined cutoff if screening positivity is analysed; thresholds vary by setting and language version | |
| Safety item | | Any endorsement of self-harm should trigger clinical review according to local protocol | |

# Modified Digital VAS / Numeric Pain Rating Scale - English Full Form

Purpose: Assessment of postoperative pain intensity at rest and during movement. In the manuscript, pain was assessed at 2, 6, 24 and 48 h postoperatively.

Instruction to participant: Please select the number that best describes your pain intensity at this moment.

| **Score** | | | **Pain anchor** | | |
| --- | --- | --- | --- | --- | --- |
| 0 | | | No pain | | |
| 1 | | | Very mild pain | | |
| 2 | | | Mild pain | | |
| 3 | | | Mild to moderate pain | | |
| 4 | | | Moderate pain | | |
| 5 | | | Moderate pain | | |
| 6 | | | Moderate to severe pain | | |
| 7 | | | Severe pain | | |
| 8 | | | Very severe pain | | |
| 9 | | | Extremely severe pain | | |
| 10 | | | Worst imaginable pain | | |
| **Assessment time point** | **Pain at rest, 0-10** | **Pain during movement, 0-10** | | **Assessor initials** | **Comments** |
| 2 h postoperatively |  |  | |  |  |
| 6 h postoperatively |  |  | |  |  |
| 24 h postoperatively |  |  | |  |  |
| 48 h postoperatively |  |  | |  |  |
