# Supplementary material
Source: Research Square preprint supplement (doi:10.21203/rs.3.rs-9936521/v1)
Supplement: Supplementary file 4 [file cfa87098950b2b02fcb317ee.docx]

**Supplementary File 4**

**Abbreviations**

CRP C-reactive protein

EPDS Edinburgh Postnatal Depression Scale

GEE Generalized estimating equations

IL-18 Interleukin-18

ISI Insomnia Severity Index

NMDA N-methyl-D-aspartate

PCA Patient-controlled analgesia

PSQI Pittsburgh Sleep Quality Index

SD Standard deviation

TAP Transversus abdominis plane

VAS Visual analog scale

**Figure 2**


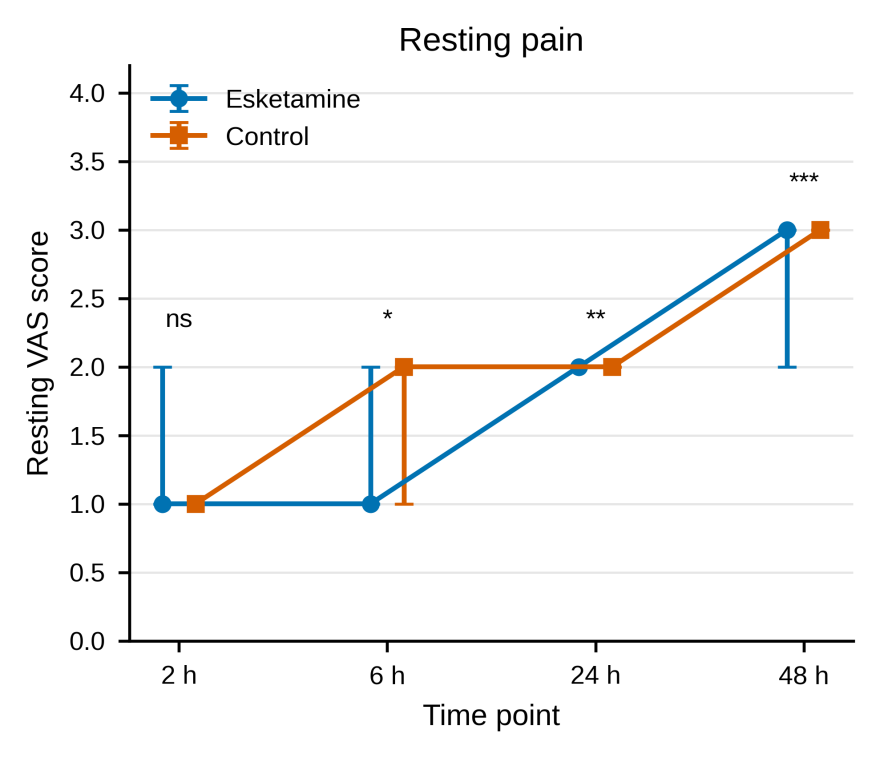


**Fig. 2** Resting VAS pain scores at 2, 6, 24, and 48 h after surgery. Values are median (P25, P75); error bars indicate interquartile ranges. Between-group comparisons are shown above each time point. ns, not significant; *P < 0.05; **P < 0.01; ***P < 0.001.

**Figure 3**


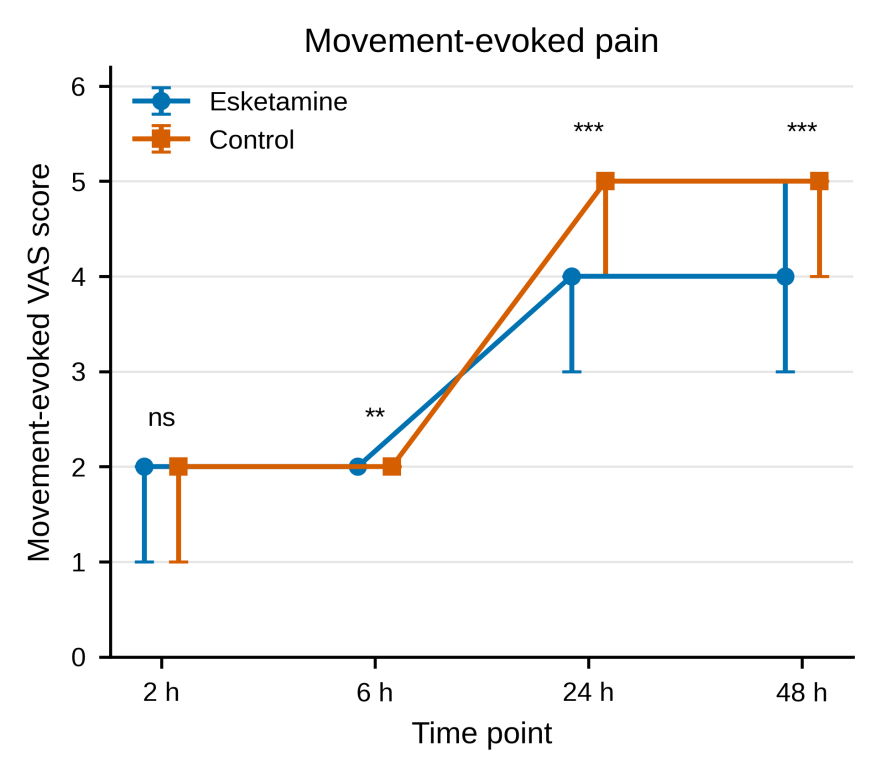


**Fig. 3** Movement-evoked VAS pain scores at 2, 6, 24, and 48 h after surgery. Values are median (P25, P75); error bars indicate interquartile ranges. Between-group comparisons are shown above each time point. ns, not significant; **P < 0.01; ***P < 0.001.

**Figure 4**


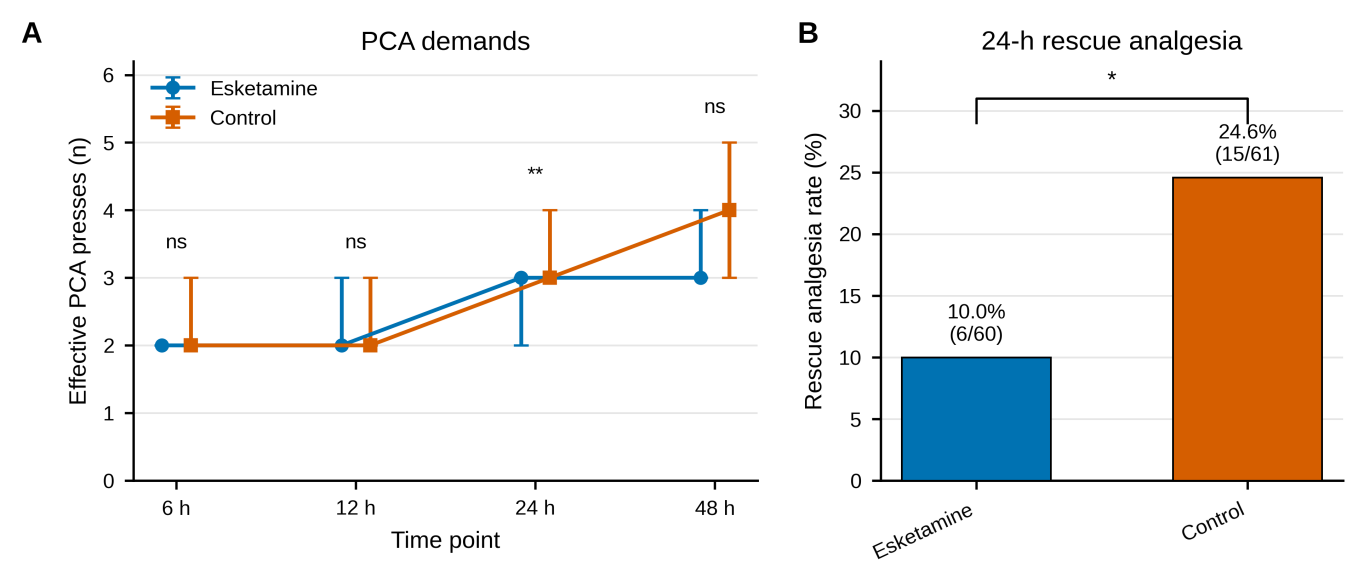


**Fig. 4** Effective PCA presses and rescue analgesia. (A) Effective PCA presses from 6 to 48 h after surgery; values are median (P25, P75). (B) Incidence of rescue analgesia within 24 h after surgery; bar labels show percentage and n/N. ns, not significant; *P < 0.05; **P < 0.01.

**Figure 5**


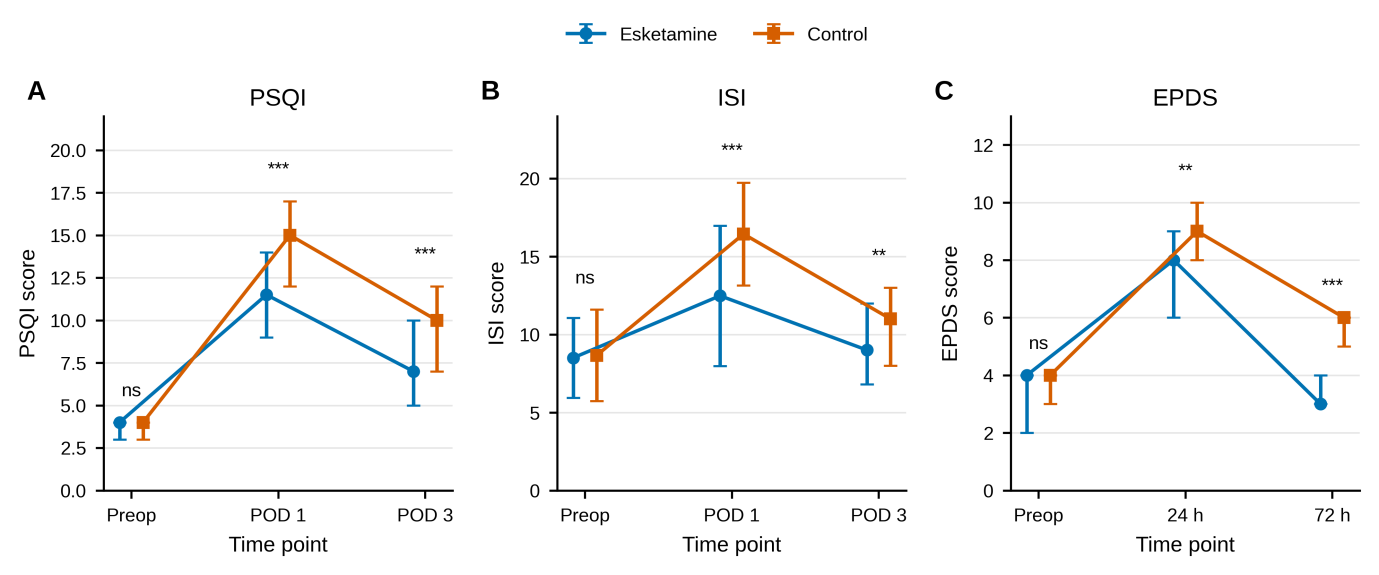


**Fig. 5** Perioperative sleep and mood-related scores. (A) PSQI; (B) ISI; (C) EPDS. Values are displayed as the table-reported central estimate with dispersion [median (P25, P75) or mean ± SD]; error bars represent the corresponding dispersion. ns, not significant; **P < 0.01; ***P < 0.001.

**Figure 6**


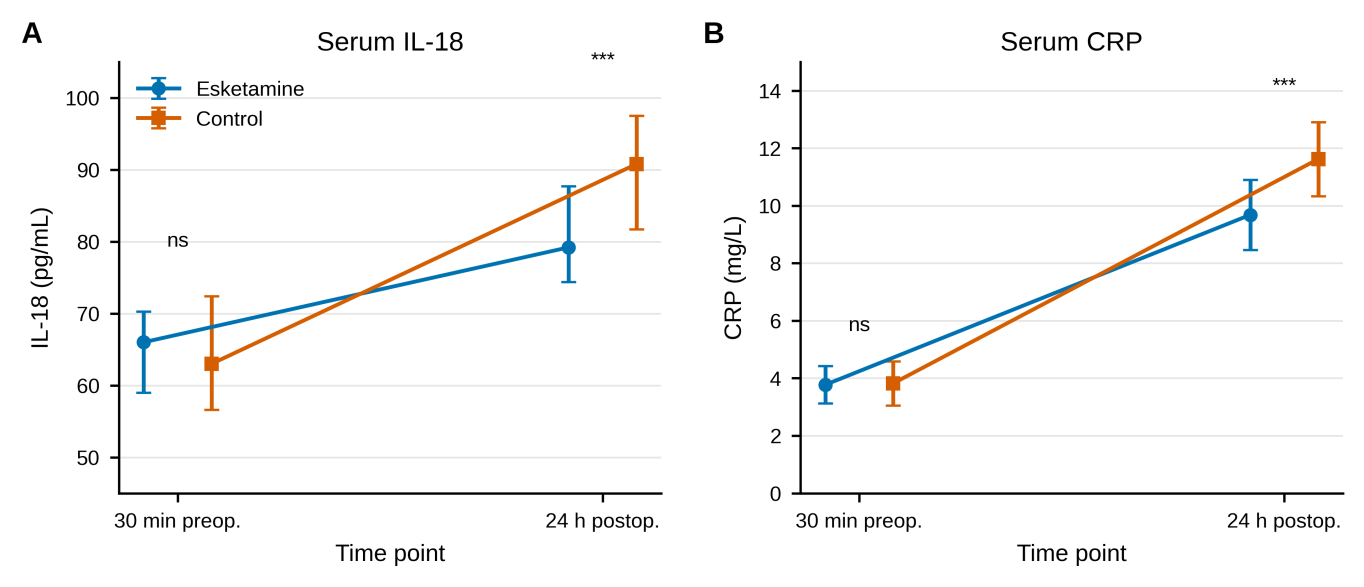


**Fig. 6** Serum inflammatory marker trajectories. (A) IL-18; (B) CRP, measured 30 min before surgery and 24 h after surgery. Values are median (P25, P75) for IL-18 and mean ± SD for CRP. ns, not significant; ***P < 0.001.
